# Supplementary material for: Multiplexed miRNA detection using cationic polythiophene
Source: Royal Society of Chemistry journal article supplement (doi:10.1039/c3ay41752b), 2014-01-01
Supplement: c3ay41752b.pdf [file c3ay41752b.pdf]

## Supporting Information

### Multiplexed miRNA Detection with Cationic Polythiophene

Weiming Zheng<sup>†</sup>, Thomas E. Chase, and Lin He<sup>\*</sup>

Department of Chemistry, North Carolina State University, Raleigh, NC 27695

<sup>\*</sup>Corresponding Author: Lin\_He@ncsu.edu, 1-919-515-2993 (Tel), 1-919-515-8920 (Fax).

<sup>†</sup>Current address: Clinical Diagnostic Group, Bio-Rad Laboratories, Benicia, CA 94510

Submit to *Anal. Method.*

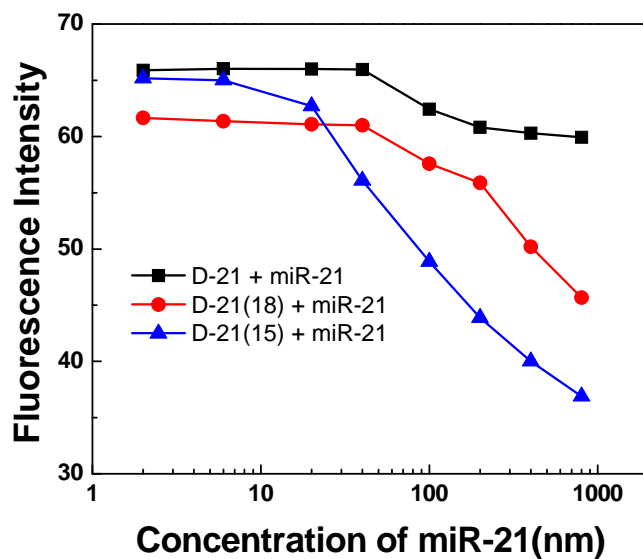

**Supporting Information Figure 1:** Titration curves of a set of competitive assays where D-21, D-21(18) and D-21(15) were used as the competing reagent for miR-21 detection in solution. A mixture of polymer/P-21 duplexes, DNA, and miR-21 was incubated at 37 °C for 1 h before measurements.

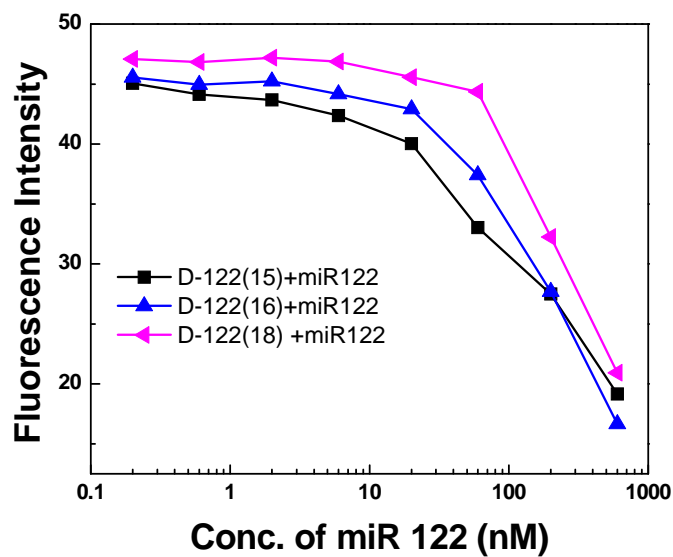

**Supporting Information Figure 2.** Titration curves of a set of competitive assays where D-122(18), D-122(16) and D-122(15) were used as the competing reagent for miR-122 detection in solution. A mixture of polymer/P-122 duplexes, DNA, and miR-122 was incubated at 37 °C for 1 h before measurements.

Zheng, et al “Multiplexed miRNA Detection...” SI Figure 2.
